# DPPA2 and DPPA4 are dispensable for mouse zygotic genome activation and preimplantation development

Zhiyuan Chen<sup>1,2,3</sup>, Zhenfei Xie<sup>1,2,3,6</sup>, and Yi Zhang<sup>1,2,3,4,5, #</sup>

<sup>1</sup>Howard Hughes Medical Institute, Boston Children's Hospital, Boston, Massachusetts 02115, USA

<sup>2</sup>Program in Cellular and Molecular Medicine, Boston Children's Hospital, Boston, Massachusetts 02115, USA

<sup>3</sup>Division of Hematology/Oncology, Department of Pediatrics, Boston Children's Hospital, Boston, Massachusetts 02115, USA

<sup>4</sup>Department of Genetics, Harvard Medical School, Boston, Massachusetts 02115, USA;

<sup>5</sup>Harvard Stem Cell Institute, WAB-149G, 200 Longwood Avenue, Boston, Massachusetts 02115, USA

<sup>6</sup>Present address: The Ragon Institute of Massachusetts General Hospital, Massachusetts Institute of Technology and Harvard University, Cambridge, MA 02139, USA

<sup>#</sup>To whom correspondence should be addressed

Emails: yzhang@genetics.med.harvard.edu;

Keywords: zygotic genome activation, *Dux*, *Dppa2/4*, 2C-like, 2-cell embryo, preimplantation development

Summary statement: Although *Dppa2/4* are essential for activating 2-cell embryo specific transcripts in mouse embryonic stem cells, they are dispensable for mouse zygotic genome activation and preimplantation development

## ABSTRACT

How maternal factors in oocytes initiate zygotic genome activation (ZGA) remains elusive in mammals, partly due to the challenge of de novo identification of key factors using scarce materials. The 2-cell (2C) embryo like cells has been widely used as an *in vitro* model to understand mouse ZGA and totipotency given its expression of a group of 2C embryo-specific genes and its simplicity for genetic manipulation. Recent studies indicate that DPPA2 and DPPA4 are required for establishing the 2C-like state in mouse embryonic stem cells (ESCs) in a DUX-dependent manner. These results suggest that DPPA2 and DPPA4 are essential maternal factors that regulate *Dux* and ZGA in embryos. By analyzing maternal knockout and maternal-zygotic knockout embryos, we unexpectedly found that DPPA2 and DPPA4 are dispensable for *Dux* activation, ZGA, and preimplantation development. Our study suggests that 2C-like cells do not fully recapitulate 2-cell embryos in terms of 2C-gene regulation and cautions should be taken when studying ZGA and totipotency using 2C-like cells as the model system.

## Introduction

Following fertilization, embryonic development relies on maternal factors deposited during oogenesis initially and then the newly generated embryonic product after its genome is activated. The awakening of embryonic genome is known as zygotic or embryonic genome activation (ZGA/EGA), which is fundamental for an embryo to acquire totipotency and to undergo normal development. In mice, ZGA is consisted of two successive waves of transcription with a minor and a major wave occurring at late 1-cell and late 2-cell stage, respectively (Schultz et al. 2018). Transcription at late 1-cell stage is largely promiscuous and the transcripts are typically inefficient of splicing and 3'processing (Abe et al. 2015), whereas the major ZGA at late 2-cell stage are coupled with the expression of thousands of translatable mRNAs (Hamatani et al. 2004; Wang et al. 2004; Zeng et al. 2004). Notably, both minor and major ZGA are essential for mouse preimplantation development (Abe et al. 2018; Schultz et al. 2018; Liu et al. 2020).

The 2C-like cells are a rare cell subpopulation in ESCs that is characterized by the expression of many 2C-specific transcripts such as *Zscan4* and *Zfp352* and has the expanded potential to contribute to both embryonic and extraembryonic lineages (Macfarlan et al. 2012). The 2C-like cells have been widely used as an *in vitro* approximate for understanding totipotency and ZGA (Fu et al. 2020; Genet and Torres-Padilla 2020). Studies in the past several years have revealed DUX (human homologue as DUX4), a double homeodomain protein, as a master regulator of 2C-like state in ESCs (De Iaco et al. 2017; Hendrickson et al. 2017; Whiddon et al. 2017). Most of the mechanisms that promote 2C-like state in ESCs identified so far directly or indirectly regulate *Dux* activation. Intriguingly, loss of *Dux* in embryos only mildly affects ZGA and the *Dux* null embryos are viable with reduced litter sizes (Chen and Zhang 2019; Guo et al. 2019; De Iaco et al. 2020; Bosnakovski et al. 2021). Thus, although DUX is important for synchronizing and enhancing the expression of some 2C embryo-specific genes, it is not essential for ZGA and embryogenesis.

Since *Dux* is not expressed in oocytes and it gets activated only at late 1-cell stage, upstream factors should have already existed in oocytes to trigger *Dux* expression during minor ZGA. Recent studies have identified the developmental pluripotency associated 2 and 4 (*Dppa2* and *4*) as essential factors for establishing the 2C-like state in ESCs by activating *Dux* (De Iaco et al. 2019; Eckersley-Maslin et al. 2019; Yan et al. 2019). In addition, DPPA2 and DPPA4 directly regulate young LINE-1 elements in ESCs in a DUX-independent manner (De Iaco et al. 2019). The young LINE-1 elements levels also increase during the major ZGA. Taken together, these findings suggest that *Dppa2* and *Dppa4*, which are expressed in oocytes, may regulate ZGA as maternal factors through both DUX-dependent and -independent pathways. In support of this, overexpression of the dominant negative forms of *Dppa2* has been shown to impair mouse preimplantation development (Hu et al. 2010; Yan et al. 2019). However, since overexpression of dominant negative forms might cause unknown side effects, these two studies did not provide definite evidence for *Dppa2/4* function in ZGA. In addition, the previous *Dppa2* and *Dppa4* zygotic knockout (KO) studies (Madan et al. 2009; Nakamura et al. 2011) did not address the potential maternal contributions of these two proteins in ZGA and preimplantation development. Thus, whether oocyte derived DPPA2 and DPPA4 activate *Dux* expression and regulate ZGA in mouse embryos remains to be formally confirmed.

In this study, we generated maternal KO and maternal-zygotic KO mouse embryos for both *Dppa2* and *Dppa4*, and determined their functions in *Dux* activation, ZGA, and preimplantation development. Our results demonstrate that both *Dppa2* and *Dppa4* are dispensable for ZGA and preimplantation development.

## Results & Discussion

### Expression dynamics of *Dppa2* and *Dppa4* in mouse early development

To test the possibility that DPPA2 and DPPA4 are involved in activating *Dux* expression and ZGA, we first determined the expression dynamics and cellular localization of these proteins in early embryos by RNA sequencing (RNA-seq) and immunostaining analyses. We found that low levels of *Dppa2* and *Dppa4* RNAs were detectable in both oocytes and zygotes, and their expression levels were dramatically increased during major ZGA and reached at peak at 8-cell stage (**Fig. 1A**). However, both *Dppa2* and *Dppa4* RNA became undetectable soon after embryo implantation (**Fig. 1A**) and their transcriptional silencing is presumably achieved by gain of DNA methylation at the promoters (Eckersley-Maslin et al. 2019).

In contrast to the RNA levels, DPPA2 and DPPA4 immunostaining signals were not detectable in both oocytes and zygotes (**Fig. 1B and C**). The signals were first detectable at late 2-cell and became stronger at the subsequent stages (**Fig. 1B and C**). At blastocyst stage, DPPA2 and DPPA4 were mostly located in inner cell mass (*i.e.*, NANOG-positive) rather than trophoblast (*i.e.*, CDX2-positive cells) (**Fig. 1D**). This observation is consistent with the previous RNA in situ hybridization experiments showing that *Dppa2* and *Dppa4* are restricted to inner cell mass at this stage (Maldonado-Saldivia et al. 2007).

### Generation of *Dppa2* and *Dppa4* maternal and maternal-zygotic KO embryos

The immunostaining results are incompatible with a potential role of DPPA2 and DPPA4 in *Dux* activation and ZGA in embryos. However, it is also possible that the very low levels of maternal DPPA2 and DPPA4 proteins in oocytes (barely detected by immunostaining) may still play a role in activating *Dux* and ZGA. To test this possibility, we generated *Gdf9-Cre*-mediated

oocyte-specific conditional KO (CKO) models for *Dppa2* (exon 3-4 floxed) (**Fig. 2A**) and *Dppa4* (exon 2-7 floxed) (**Fig. 2B**). The *Gdf9-Cre* is expressed in early growing oocytes around postnatal day 3 (Lan et al. 2004). Since the *Dppa4* flox (*fl*) allele has been previously established and described (Nakamura et al. 2011), we only characterized in detail of the *Dppa2 fl* allele that was generated in this study using the 2-cell homologous recombination (2C-HR)-CRISPR method (Gu et al. 2018)(**Fig. S1A-B**). Sanger sequencing analyses confirmed that exon 3-4 of *Dppa2* were successfully depleted in the CKO oocytes (**Fig. S1C**), resulting in a frameshift with the disruption of both the SAP and C-terminal domains. Since *Dppa2* and *Dppa4* are closely linked on the same chromosome, it is not feasible to generate *Dppa2* and *Dppa4* double CKO mice by natural mating.

We next sought to confirm successful KO of DPPA2 and DPPA4 at the protein level. Because of the weak immunostaining signals of DPPA2 and DPPA4 before 4-cell stage (**Fig. 1B**), it was challenging to determine their signal loss in CKO oocytes and maternal KO 1-cell/2-cell embryos. To circumvent this issue, immunostaining analyses were performed at 4-cell stage for maternal KO (*m-z*+) and maternal-zygotic KO (*m-z*-) embryos generated by crossing CKO female mice with heterozygous male mice (**Fig. 2C**). The signal intensities of DPPA2 and DPPA4 in maternal KO 4-cells were largely comparable to the wild-type (WT) embryos (**Fig. 2C and Fig. 1B**). This suggests that *Dppa2* and *Dppa4* were zygotically expressed from the WT paternal alleles, which compensated for the maternal loss. In contrast, DPPA2 and DPPA4 signals were not detectable in *m-z-Dppa2* and *m-z-Dppa4* 4-cell embryos, respectively (**Fig. 2C-D**), confirming the successful KO of these proteins. It is worth noting that loss of one protein caused reduced signal of the other in maternal-zygotic KO 4-cell embryos, albeit to different extents (**Fig. 2C-D**). This is perhaps due to the fact that DPPA2 and DPPA4 function as a heterodimer (Nakamura et al. 2011; Hernandez et al. 2018) and loss of one affected the stability of the other as has been observed in ESCs (Gretarsson and Hackett 2020).

### **DPPA2 and DPPA4 are not required for preimplantation development**

Having confirmed the successful KO of DPPA2 and DPPA4 in embryos, we next examined the KO impact on preimplantation development. To this end, spermatozoa from WT male mice were used to fertilize oocytes from control and CKO female mice *in vitro*, generating

WT ( $m+z+$ ) and maternal KO ( $m-z+$ ) embryos. To exclude the possibility that WT paternal copy may compensate for the maternal losses, CKO oocytes were also fertilized with heterozygous spermatozoa, which should generate maternal-zygotic KO ( $m-z-$ ) in half of the embryos. Unexpectedly, none of the embryo groups showed apparent preimplantation defects and  $m-z-$  blastocysts were identified by immunostaining at the expected Mendelian ratio (**Fig. 3A-B**). It should be noted that loss of both DPPA2 and DPPA4 in  $m-z-Dppa4$  blastocysts making these embryos equivalent to  $Dppa2/4$  double KO (**Fig. 3B**). Importantly, analyses of the *in vivo* blastocysts collected after natural mating also led to the same observations (**Fig. 3C-D, Fig. S2A**). In sum, these results indicate that DPPA2 and DPPA4 are not required for mouse preimplantation development.

Having confirmed the dispensable role of DPPA2/4 in preimplantation development, we next examined whether they are critical for post-implantation development. Mating analyses revealed that, although maternal DPPA2 or DPPA4 is not required for development, few  $m-z-Dppa2$  and  $m-z-Dppa4$  developed to weaning stage (**Fig. S2B**). The lethality of  $m-z-$  mutants should occur around or after birth because a close to Mendelian ratio was observed at E18.5 (**Fig. S2B**). However, the  $m-z-$  mutants already showed some phenotypes, including smaller sizes and/or pale skins by E18.5 (**Fig. S2C**). These data suggest that loss of maternal-zygotic DPPA2 or DPPA4 causes peri-natal lethality, which is very similar to the zygotic knockouts of DPPA2 and/or DPPA4 previously reported (Madan et al. 2009; Nakamura et al. 2011). Thus, DPPA2 and/or DPPA4 are critical for post-implantation, but not pre-implantation development.

### **DPPA2 and DPPA4 are dispensable for *Dux* expression and ZGA**

Given that mouse preimplantation development is largely normal without DPPA2 or DPPA4, minimal ZGA defects are expected in these mutants. To confirm this prediction, we performed RNA-seq experiments. To determine whether DPPA2 and DPPA4 initiate *Dux* transcription during minor ZGA and subsequently affect major ZGA, late 1-cell and late 2-cell embryos of control and maternal KO were collected for RNA-seq analyses (**Fig. S3A**). Maternal-zygotic KO single 2-cell embryos were also analyzed to exclude the possibility that WT paternal allele in  $m-z+$  embryos may compensate for the maternal loss (**Fig. S3B**). All RNA-seq biological replicates were highly reproducible (**Fig. S3A-B**), and the RNA-seq genome browser

views confirmed the success of Cre-mediated depletion of *Dppa2* and *Dppa4* in the *m-z+* late 1-cell (**Fig. S4A**) and *m-z-* late 2-cell embryos (**Fig. 4A**).

We next performed comparative analyses in *m+z+*, *m-z+*, and *m-z-* embryos to identify differentially expressed genes (fragments per kilobase of transcript per million mapped reads (FPKM) >1, fold change (FC) >2, and adjusted *p*-value < 0.05). As expected, minimal changes in gene/repeat expression were observed in both *m-z+* and *m-z-* mutant embryos (**Fig. S4B-C**, **Fig. 4B**, **Table S1 and S2**). Note that both *Dux* and its target genes/repeats such as *Zscan4*, *Zfp352*, *MERVL-int*, and *MT2\_Mm* were normally activated during minor and major ZGA. In addition, the young LINE-1 elements, including *LIMd\_A* and *LIMd\_T*, which are regulated by DPPA2 and DPPA4 independent of DUX in ESCs (De Iaco et al. 2019), were also normally expressed in late 2-cell embryos (**Fig. S4C**, **Fig. 4B**). Consistent with minimal transcriptome alterations, the major ZGA genes (n = 2470, 2-cell/1-cell: FC > 5, FPKM > 3, adjusted *p*-value < 0.05), including those previously reported to be regulated by DPPA2 and DPPA4 in ESCs, also showed normal activation (**Fig. 4C-D**, **Fig. S4D**). Thus, our data support that DPPA2 and DPPA4 are dispensable for *Dux* expression and ZGA in mouse early embryos.

Collectively, our data provide definite evidence that maternal DPPA2 and DPPA4 are not required to trigger the activation of *Dux* and other 2C embryo-specific genes during mouse ZGA. Although generation of double KOs were not feasible by natural mating due to their close genetic linkage, DPPA2 and DPPA4 should not compensate for each other for the following reasons. First, DPPA2 and DPPA4 function as a heterodimer (Nakamura et al. 2011; Hernandez et al. 2018). Loss of either protein causes comparable phenotypes to the double KOs during both ESC differentiation (*i.e.*, failure of developmental gene activation) (Eckersley-Maslin et al. 2020; Gretarsson and Hackett 2020) and embryogenesis (*i.e.*, lung developmental defects and perinatal lethality) (Madan et al. 2009; Nakamura et al. 2011). Second, our immunostaining analyses indicated that DPPA2 became almost undetectable when DPPA4 was depleted in early embryos (**Fig. 2C**, **Fig. 3B**, **3D**), suggesting that similar results are expected from maternal-zygotic double KO. Therefore, compensation for each other should not explain the lack of apparent preimplantation phenotype for the DPPA2 and DPPA4 mutants analyzed in this study.

Together with the evidence that DUX does not initiate ZGA in embryos (Chen and Zhang 2019; Guo et al. 2019; De Iaco et al. 2020; Bosnakovski et al. 2021), this study further highlights the key differences between 2C-like cells and 2-cell embryos. In ESCs, both DUX and DPPA2/4 heterodimer are essential for establishing the 2C-like state (De Iaco et al. 2017; Hendrickson et al. 2017; De Iaco et al. 2019; Eckersley-Maslin et al. 2019; Yan et al. 2019). However, this is not the case in mouse embryos. Therefore, conclusions drawn from 2C-like cells should be carefully considered before being applied to the embryo scenario. Recently, TP53 has been identified as a maternal factor to regulate DUX and 2C-genes in both ESCs and embryos (Grow et al. 2021; Sun et al. 2021). Nonetheless, *Dux* also gets activated in *Tp53* maternal-zygotic KO embryos, although to a less extent than in WT (Grow et al. 2021). Thus, multiple pioneer factors may exist to trigger *Dux* and/or other minor ZGA genes (Kobayashi and Tachibana 2021).

Despite DPPA2 and DPPA4 are dispensable for ZGA, they may be required for maintaining a permissive chromatin state during gastrulation by counteracting DNA methylation, as suggested by the studies in ESCs (Eckersley-Maslin 2020; Eckersley-Maslin et al. 2020; Gretarsson and Hackett 2020). Indeed, our data revealed a perinatal lethality phenotype of maternal-zygotic KO of DPPA2 or DPPA4, which is largely similar to the previously reported zygotic KO mutants of DPPA2 and/or *Dppa4*. It is likely that loss of DPPA2 and DPPA4 may cause epigenomic defects around gastrulation, which ultimately contribute to the perinatal lethality phenotype (Madan et al. 2009; Nakamura et al. 2011). This hypothesis warrants to be examined by future studies.

## **Materials and Methods**

### **Collection of mouse oocytes and preimplantation embryos**

All animal studies were performed in accordance with guidelines of the Institutional Animal Care and Use Committee at Harvard Medical School. The procedures of GV and MII oocytes collection and *in vitro* fertilization (IVF) were described previously (Chen and Zhang 2019; Zhang et al. 2020). For all experiments, 6-9-week-old mice were used. The *in vitro* fertilized embryos were cultured in KSOM (Millipore) at 37°C under 5% CO<sub>2</sub> with air. The *in vivo* blastocysts were collected by flushing reproductive tracts at E3.5. The day of vaginal plug was counted as E0.5.



### Generation of *Dppa2* and *Dppa4* mutant oocytes and embryos

The *Gdf9-Cre* transgenic line and the *Dppa4 fl* line were described previously (Lan et al. 2004; Nakamura et al. 2011). The *Dppa2 fl* allele was generated by the 2C-HR-CRISPR method (Gu et al. 2018). Specifically, *Cas9* mRNA (100 ng/μl), two sgRNAs (80 ng/μl each), and donor DNA PCR fragment (no biotin) (25 ng/μl) were co-injected into cytoplasm of each 2-cell blastomere using a Piezo impact-driven micromanipulator (Primer Tech). The PCR fragment with ~0.9-1kb homologous arms was used because high knock-in efficiency was reported for this donor DNA preparation method (Yao et al. 2018). After injection, the embryos were cultured for a few hours before transferred into oviducts of surrogate ICR strain mothers. The synthesis of *Cas9* mRNA and sgRNA was described previously (Wang et al. 2013). The donor DNA targeting vector was cloned using the Gibson Assembly method and the primers used for cloning are listed in **Table S3**. The *Dppa2 fl* F<sub>0</sub> mice (BDF1 × BDF1) (Jackson 100006) were crossed with B6 (Jackson 000664) to confirm the germline transmission.

The breeding schemes were the same for *Dppa2* and *Dppa4* lines. Specifically, the *+/fl* lines were crossed with *Gdf9-Cre* to obtain *Gdf9-Cre, +/fl* males. The *Gdf9-Cre, +/fl* males were then crossed with *+/fl* females to obtain *Gdf9-Cre, fl/fl* males and *fl/fl* females. They were then crossed to generate *fl/fl* (control) and *Gdf9-Cre, fl/fl* females (CKO) for experiments. The male mice that were heterozygous for Cre-mediated depletions were obtained by crossing *Gdf9-Cre, +/fl* females with WT B6 males. For all mouse lines, the tail tips were used for genotyping using primers listed in **Table S3**.

### Whole mount immunostaining

The immunostaining, image acquisition, and analyses were the same as previously described (Inoue et al. 2018). The primary and secondary antibodies are listed in **Table S3**.

### RNA-seq libraries preparation and data processing

The reverse-stranded total RNA-seq libraries (**Fig. S4** and **Fig. S3A**) were prepared using the SMARTer-Seq Stranded kit (Takara) following the manufacturer's instructions. For single embryo RNA-seq (**Fig. 4** and **Fig. S3B**), the cDNA was synthesized using the SMARTer Ultra low Input RNA cDNA preparation kit (Takara). The cDNA was then used for genotyping by

quantitative PCR (primers in **Table S3**) and three embryos for each genotype (*i.e.*, *m-z+* or *m-z-*) were selected for library construction using the Nextera XT DNA Library Preparation Kit (Illumina). The single embryo RNA-seq libraries were non-stranded and only PolyA+ RNA was captured. For all RNA-seq libraries, paired-end 75-bp sequencing was performed on a NextSeq 550 sequencer (Illumina). A summary of the generated data sets is available in **Table S2**.

The total RNA-seq (**Fig. S4**) and polyA RNA-seq (**Fig. 4**) were processed following the pipelines as previously described (Chen and Zhang 2019; Chen et al. 2021). Briefly, the RNA-seq reads were trimmed to remove low quality reads and adaptors using TrimGalore (v0.4.5) before being aligned to mm10 assembly using HISAT2 (v.2.1.0)(Kim et al. 2015). StringTie (v1.3.3b) was used to quantify gene FPKM values (Pertea et al. 2016). For differential expression analyses, DESeq2 (v1.24.0)(Love et al. 2014) was used to compute adjusted p-values on read counts generated by TETranscripts (v. 2.1.4)(Jin et al. 2015). TETranscripts summarizes only uniquely aligned reads for genes and both uniquely and ambiguously (*i.e.*, due to multiple insertions of repeats) mapped reads for transposable elements. RNA-seq pipeline and data processing R-codes are available at Github ([https://github.com/YiZhang-lab/Nonessential\\_role\\_of\\_Dppa2\\_4\\_in\\_ZGA](https://github.com/YiZhang-lab/Nonessential_role_of_Dppa2_4_in_ZGA)).

### **Statistical analyses and data visualization**

Statistical analyses were performed in R ([www.r-project.org/](http://www.r-project.org/)). All sequencing tracks were visualized using the UCSC genome browser (Kent et al. 2002).

### **Data availability**

The RNA-seq data generated in this study have been deposited in the Gene Expression Omnibus under accession number GSE181723 (reviewer token: ivulqqcclhsdbgd). The RNA-seq data of mouse oocytes and early embryos (**Fig. 1A**) were from GSE66582 (Wu et al. 2016) and GSE76505 (Zhang et al. 2018). The RNA-seq data of ESCs presented in **Fig. 4** and **Fig. S4** were from GSE120952 (Eckersley-Maslin et al. 2019), GSE126621 (De Iaco et al. 2019), and GSE127811 (Yan et al. 2019).

## AUTHOR CONTRIBUTIONS

Y.Z. conceived the project; Z.C and Y.Z. designed the experiments; Z.C performed the experiments and analyzed the data sets; Z.X generated the *Dppa2* flox allele; Z.C and Y.Z. interpreted the data and wrote the manuscript.

## ACKNOWLEDGMENTS

We would like to thank Dr. Yota Hagihara for his help in some immunostaining experiments; Drs. Chunxia Zhang, Wenhao Zhang, Yota Hagihara, and Cheng-Jie Zhou for critical reading of the manuscript. This project was supported by NIH (R01HD092465) and HHMI. Y.Z. is an Investigator of the Howard Hughes Medical Institute. Z.C. is currently supported by the Eunice Kennedy Shriver National Institute of Child Health and Human Development (K99HD104902).

## AUTHOR INFORMATION

The authors declare no competing financial interests.

## References

Abe K, Yamamoto R, Franke V, Cao M, Suzuki Y, Suzuki MG, Vlahovicek K, Svoboda P, Schultz RM, Aoki F. 2015. The first murine zygotic transcription is promiscuous and uncoupled from splicing and 3' processing. *The EMBO journal* **34**: 1523-1537.

Abe KI, Funaya S, Tsukioka D, Kawamura M, Suzuki Y, Suzuki MG, Schultz RM, Aoki F. 2018. Minor zygotic gene activation is essential for mouse preimplantation development. *Proceedings of the National Academy of Sciences of the United States of America* **115**: E6780-E6788.

Bosnakovski D, Gearhart MD, Ho Choi S, Kyba M. 2021. Dux facilitates post-implantation development, but is not essential for zygotic genome activation. *Biology of reproduction* **104**: 83-93.

Chen Z, Djekidel MN, Zhang Y. 2021. Distinct dynamics and functions of H2AK119ub1 and H3K27me3 in mouse preimplantation embryos. *Nature genetics* **53**: 551-563.

Chen Z, Zhang Y. 2019. Loss of DUX causes minor defects in zygotic genome activation and is compatible with mouse development. *Nature genetics* **51**: 947-951.

De Iaco A, Coudray A, Duc J, Trono D. 2019. DPPA2 and DPPA4 are necessary to establish a 2C-like state in mouse embryonic stem cells. *EMBO Rep* **20**.

De Iaco A, Planet E, Coluccio A, Verp S, Duc J, Trono D. 2017. DUX-family transcription factors regulate zygotic genome activation in placental mammals. *Nature genetics* **49**: 941-945.

De Iaco A, Verp S, Offner S, Grun D, Trono D. 2020. DUX is a non-essential synchronizer of zygotic genome activation. *Development* **147**.

Eckersley-Maslin M, Alda-Catalinas C, Blotenburg M, Kreibich E, Krueger C, Reik W. 2019. Dppa2 and Dppa4 directly regulate the Dux-driven zygotic transcriptional program. *Genes & development* **33**: 194-208.

Eckersley-Maslin MA. 2020. Keeping your options open: insights from Dppa2/4 into how epigenetic priming factors promote cell plasticity. *Biochem Soc Trans* **48**: 2891-2902.

Eckersley-Maslin MA, Parry A, Blotenburg M, Krueger C, Ito Y, Franklin VNR, Narita M, D'Santos CS, Reik W. 2020. Epigenetic priming by Dppa2 and 4 in pluripotency facilitates multi-lineage commitment. *Nature structural & molecular biology* **27**: 696-705.

Fu X, Zhang C, Zhang Y. 2020. Epigenetic regulation of mouse preimplantation embryo development. *Curr Opin Genet Dev* **64**: 13-20.

Genet M, Torres-Padilla ME. 2020. The molecular and cellular features of 2-cell-like cells: a reference guide. *Development* **147**.

Gretarsson KH, Hackett JA. 2020. Dppa2 and Dppa4 counteract de novo methylation to establish a permissive epigenome for development. *Nature structural & molecular biology* **27**: 706-716.

Grow EJ, Weaver BD, Smith CM, Guo J, Stein P, Shadle SC, Hendrickson PG, Johnson NE, Butterfield RJ, Menafrá R et al. 2021. p53 convergently activates Dux/DUX4 in embryonic stem cells and in facioscapulohumeral muscular dystrophy cell models. *Nature genetics*.

Gu B, Posfai E, Rossant J. 2018. Efficient generation of targeted large insertions by microinjection into two-cell-stage mouse embryos. *Nature biotechnology* **36**: 632-637.

Guo M, Zhang Y, Zhou J, Bi Y, Xu J, Xu C, Kou X, Zhao Y, Li Y, Tu Z et al. 2019. Precise temporal regulation of Dux is important for embryo development. *Cell Res* **29**: 956-959.

Hamatani T, Carter MG, Sharov AA, Ko MS. 2004. Dynamics of global gene expression changes during mouse preimplantation development. *Developmental cell* **6**: 117-131.

Hendrickson PG, Dorais JA, Grow EJ, Whiddon JL, Lim JW, Wike CL, Weaver BD, Pflueger C, Emery BR, Wilcox AL et al. 2017. Conserved roles of mouse DUX and human DUX4 in activating cleavage-stage genes and MERVL/HERVL retrotransposons. *Nature genetics* **49**: 925-934.

Hernandez C, Wang Z, Ramazanov B, Tang Y, Mehta S, Dambrot C, Lee YW, Tessema K, Kumar I, Astudillo M et al. 2018. Dppa2/4 Facilitate Epigenetic Remodeling during Reprogramming to Pluripotency. *Cell stem cell* **23**: 396-411 e398.

Hu J, Wang F, Zhu X, Yuan Y, Ding M, Gao S. 2010. Mouse ZAR1-like (XM\_359149) colocalizes with mRNA processing components and its dominant-negative mutant caused two-cell-stage embryonic arrest. *Dev Dyn* **239**: 407-424.

Inoue A, Chen Z, Yin Q, Zhang Y. 2018. Maternal Eed knockout causes loss of H3K27me3 imprinting and random X inactivation in the extraembryonic cells. *Genes & development*.

Jin Y, Tam OH, Paniagua E, Hammell M. 2015. TEtranscripts: a package for including transposable elements in differential expression analysis of RNA-seq datasets. *Bioinformatics* **31**: 3593-3599.

Kent WJ, Sugnet CW, Furey TS, Roskin KM, Pringle TH, Zahler AM, Haussler D. 2002. The human genome browser at UCSC. *Genome research* **12**: 996-1006.

Kim D, Langmead B, Salzberg SL. 2015. HISAT: a fast spliced aligner with low memory requirements. *Nat Methods* **12**: 357-360.

Kobayashi W, Tachibana K. 2021. Awakening of the zygotic genome by pioneer transcription factors. *Curr Opin Struct Biol* **71**: 94-100.

Lan ZJ, Xu X, Cooney AJ. 2004. Differential oocyte-specific expression of Cre recombinase activity in GDF-9-iCre, Zp3cre, and Msx2Cre transgenic mice. *Biology of reproduction* **71**: 1469-1474.

Liu B, Xu Q, Wang Q, Feng S, Lai F, Wang P, Zheng F, Xiang Y, Wu J, Nie J et al. 2020. The landscape of RNA Pol II binding reveals a stepwise transition during ZGA. *Nature* **587**: 139-144.

Love MI, Huber W, Anders S. 2014. Moderated estimation of fold change and dispersion for RNA-seq data with DESeq2. *Genome biology* **15**: 550.

Macfarlan TS, Gifford WD, Driscoll S, Lettieri K, Rowe HM, Bonanomi D, Firth A, Singer O, Trono D, Pfaff SL. 2012. Embryonic stem cell potency fluctuates with endogenous retrovirus activity. *Nature* **487**: 57-63.

Madan B, Madan V, Weber O, Tropel P, Blum C, Kieffer E, Viville S, Fehling HJ. 2009. The pluripotency-associated gene Dppa4 is dispensable for embryonic stem cell identity and germ cell development but essential for embryogenesis. *Molecular and cellular biology* **29**: 3186-3203.

Maldonado-Saldivia J, van den Bergen J, Krouskos M, Gilchrist M, Lee C, Li R, Sinclair AH, Surani MA, Western PS. 2007. Dppa2 and Dppa4 are closely linked SAP motif genes restricted to pluripotent cells and the germ line. *Stem Cells* **25**: 19-28.

Nakamura T, Nakagawa M, Ichisaka T, Shiota A, Yamanaka S. 2011. Essential roles of ECAT15-2/Dppa2 in functional lung development. *Molecular and cellular biology* **31**: 4366-4378.

Pertea M, Kim D, Pertea GM, Leek JT, Salzberg SL. 2016. Transcript-level expression analysis of RNA-seq experiments with HISAT, StringTie and Ballgown. *Nature protocols* **11**: 1650-1667.

Schultz RM, Stein P, Svoboda P. 2018. The oocyte-to-embryo transition in mouse: past, present, and future. *Biology of reproduction* **99**: 160-174.

Sun Z, Yu H, Zhao J, Tan T, Pan H, Zhu Y, Chen L, Zhang C, Zhang L, Lei A et al. 2021. LIN28 coordinately promotes nucleolar/ribosomal functions and represses the 2C-like transcriptional program in pluripotent stem cells. *Protein Cell*.

Wang H, Yang H, Shivalila CS, Dawlaty MM, Cheng AW, Zhang F, Jaenisch R. 2013. One-step generation of mice carrying mutations in multiple genes by CRISPR/Cas-mediated genome engineering. *Cell* **153**: 910-918.

Wang QT, Piotrowska K, Ciemerych MA, Milenkovic L, Scott MP, Davis RW, Zernicka-Goetz M. 2004. A genome-wide study of gene activity reveals developmental signaling pathways in the preimplantation mouse embryo. *Developmental cell* **6**: 133-144.

Whiddon JL, Langford AT, Wong CJ, Zhong JW, Tapscott SJ. 2017. Conservation and innovation in the DUX4-family gene network. *Nature genetics* **49**: 935-940.

Wu J, Huang B, Chen H, Yin Q, Liu Y, Xiang Y, Zhang B, Liu B, Wang Q, Xia W et al. 2016. The landscape of accessible chromatin in mammalian preimplantation embryos. *Nature* **534**: 652-657.

Yan YL, Zhang C, Hao J, Wang XL, Ming J, Mi L, Na J, Hu X, Wang Y. 2019. DPPA2/4 and SUMO E3 ligase PIAS4 opposingly regulate zygotic transcriptional program. *PLoS biology* **17**: e3000324.

Yao X, Zhang M, Wang X, Ying W, Hu X, Dai P, Meng F, Shi L, Sun Y, Yao N et al. 2018. Tild-CRISPR Allows for Efficient and Precise Gene Knockin in Mouse and Human Cells. *Developmental cell* **45**: 526-536 e525.

Zeng F, Baldwin DA, Schultz RM. 2004. Transcript profiling during preimplantation mouse development. *Dev Biol* **272**: 483-496.

Zhang C, Chen Z, Yin Q, Fu X, Li Y, Stopka T, Skoultchi AI, Zhang Y. 2020. The chromatin remodeler Snf2h is essential for oocyte meiotic cell cycle progression. *Genes & development* **34**: 166-178.

Zhang Y, Xiang Y, Yin Q, Du Z, Peng X, Wang Q, Fidalgo M, Xia W, Li Y, Zhao ZA et al. 2018. Dynamic epigenomic landscapes during early lineage specification in mouse embryos. *Nature genetics* **50**: 96-105.

## Figures

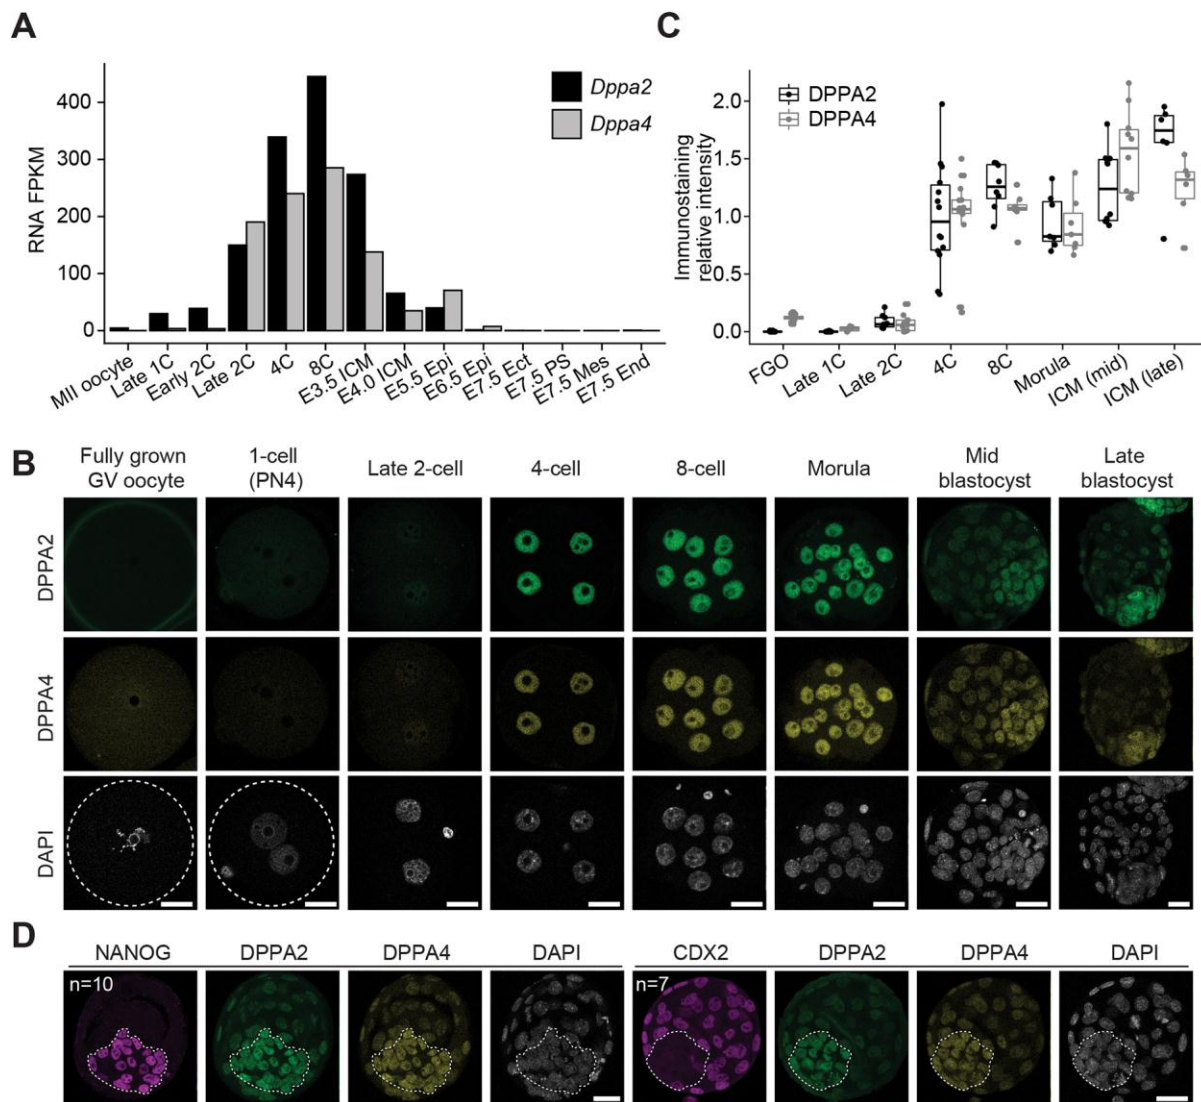

**Figure 1. Expression and cellular localization of DPPA2 and DPPA4 in mouse oocytes and early embryos**

**A**) RNA levels of *Dppa2* and *Dppa4* in oocyte and early embryos. The RNA-seq data were from (Wu et al. 2016; Zhang et al. 2018). **FPKM**: fragments per kilobase of transcript per million mapped reads; **E**: embryonic day; **ICM**: inner cell mass; **Epi**: epiblast; **Ect**: ectoderm; **End**: endoderm; **Mes**: mesoderm; **PS**: primitive streak.

**B**) Images of oocytes and preimplantation embryos immunostained with antibodies against DPPA2 and DPPA4. **Scale bar**: 20  $\mu$ m; **GV**: germinal vesicle; **PN**: pronucleus.

**C)** Quantification of the signal intensities of DPPA2 and DPPA4. The average signal intensities of 4-cell embryos were set as 1.0. The total number of oocytes/embryos analyzed were 13 for oocytes, eight for 1-cell embryos, nine for 2-cell embryos, 14 for 4-cell embryos, eight for 8-cell embryos, seven for morulae, 10 for mid blastocysts, and six for late blastocysts, respectively. The middle lines represent medians. The box hinges indicate the 25<sup>th</sup> and 75<sup>th</sup> percentiles, and the whiskers indicate the hinge  $\pm 1.5 \times$  interquartile range. **FGO:** fully grown GV oocytes.

**D)** Images of blastocysts immunostained with antibodies against DPPA2, DPPA4, NANOG, and/or CDX2. Number of embryos analyzed are as labeled. **Scale bar:** 20  $\mu\text{m}$ .



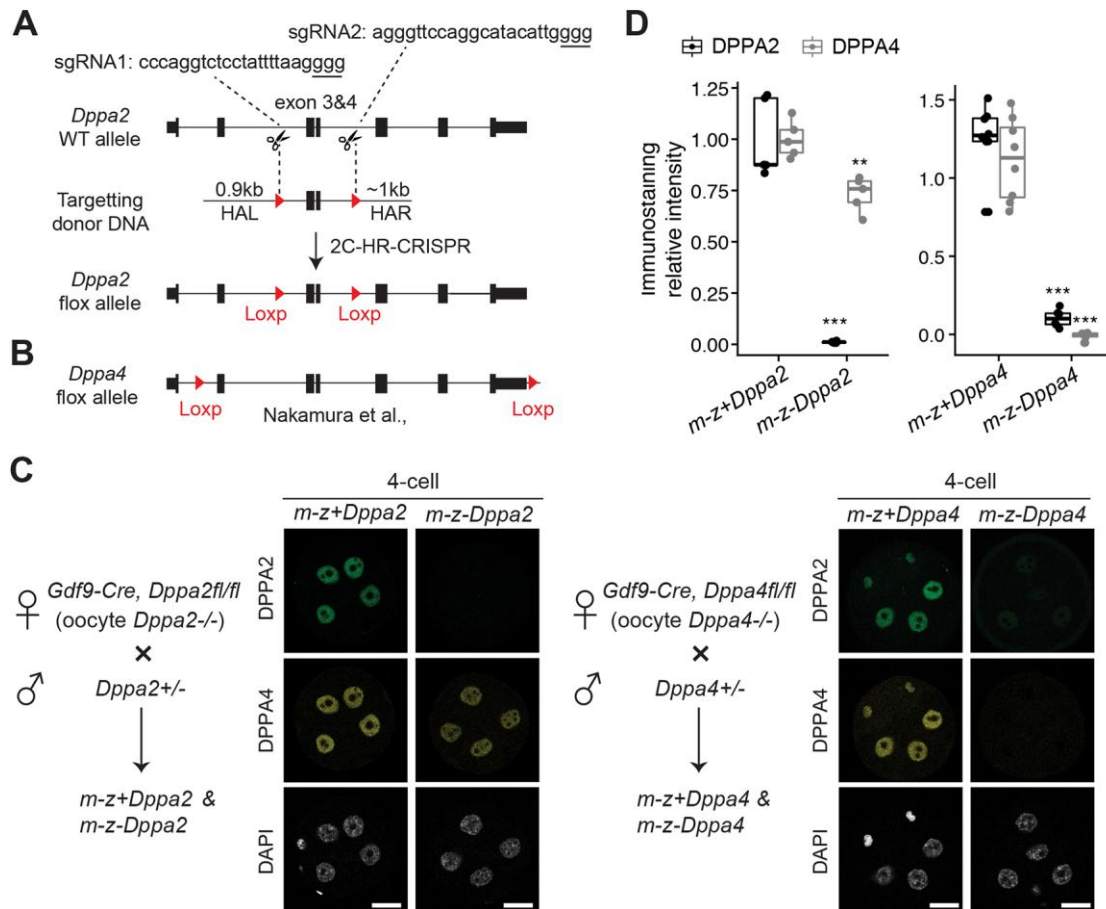

**Figure 2. Generation of maternal KO (*m-z+*) and maternal-zygotic KO (*m-z-*) embryos for *Dppa2* and *Dppa4***

**A)** Gene targeting strategy for *Dppa2* flox allele. **HAL**: left homologous arm; **HAR**: right homologous arm; **HR**: homologous recombination.

**B)** Schematics for *Dppa4* flox allele (Nakamura et al. 2011).

**C)** Schematics for generating *m-z+* and *m-z-* embryos and images of 4-cell embryos immunostained with antibodies against DPPA2 and DPPA4.

**D)** Quantifications of signal intensities of DPPA2 and DPPA4. The average signal intensities of *m-z+* embryos were set as 1.0. The number of embryos analyzed were five for *m-z+**Dppa2*, five for *m-z-**Dppa2*, eight for *m-z+**Dppa4*, and six for *m-z-**Dppa4*, respectively. The middle lines represent medians. The box hinges indicate the 25<sup>th</sup> and 75<sup>th</sup> percentiles, and the whiskers indicate the hinge  $\pm 1.5 \times$  interquartile range. (\*\*\*)  $P < 0.001$ , (\*\*)  $P < 0.01$ , two-tailed Student *t*-test.

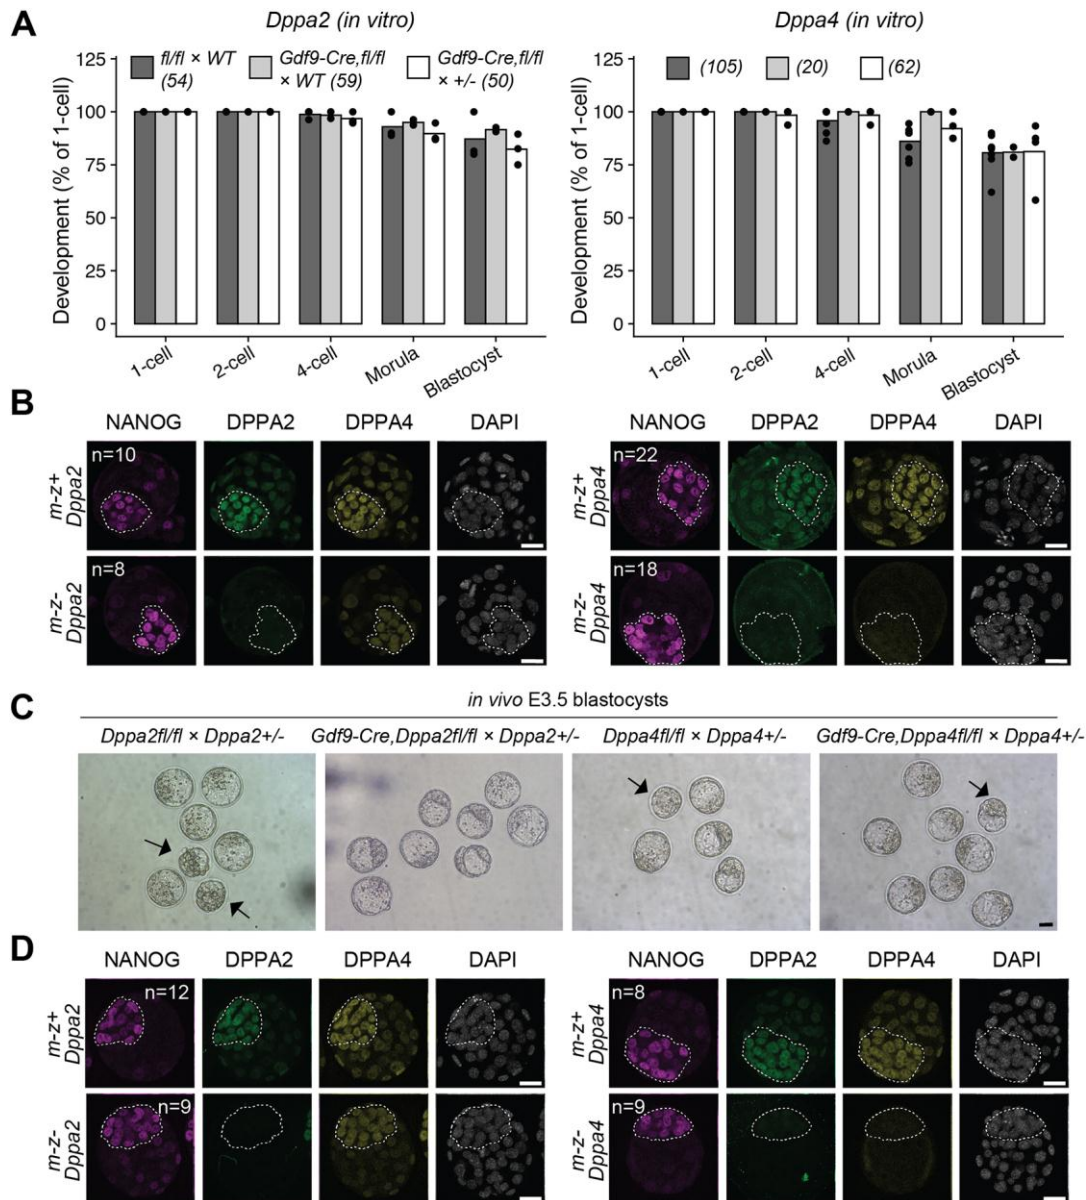

**Figure3. Embryos without DPPA2 and DPPA4 undergo normal preimplantation development**

**A)** Bar graphs showing the percentage of *in vitro* fertilized 1-cell embryos reaching the indicated developmental stages when cultured *in vitro*. The number of experiments performed are denoted by dots. Total number of embryos analyzed for each group are shown in parenthesis. A subset of blastocysts were genotyped by immunostaining shown in panel **B**).

**B)** Images of *in vitro* blastocysts immunostained with antibodies against NANOG, DPPA2, DPPA4. The numbers of embryos with indicated genotypes are as shown. Scale bar: 20  $\mu\text{m}$ .

**C)** Representative images of E3.5 blastocysts flushed from reproductive tracts after natural mating. Each image was obtained from one litter. Arrows point to the not fully expanded blastocysts, which were found in both control and CKO groups. Scale bar: 20  $\mu\text{m}$ . **Fig. S2A** summarizes all the collected *in vivo* blastocysts.

**D)** Images of *in vivo* blastocysts immunostained with antibodies against NANOG, DPPA2, DPPA4. The numbers of embryos with indicated genotypes are as shown. Scale bar: 20  $\mu\text{m}$ .

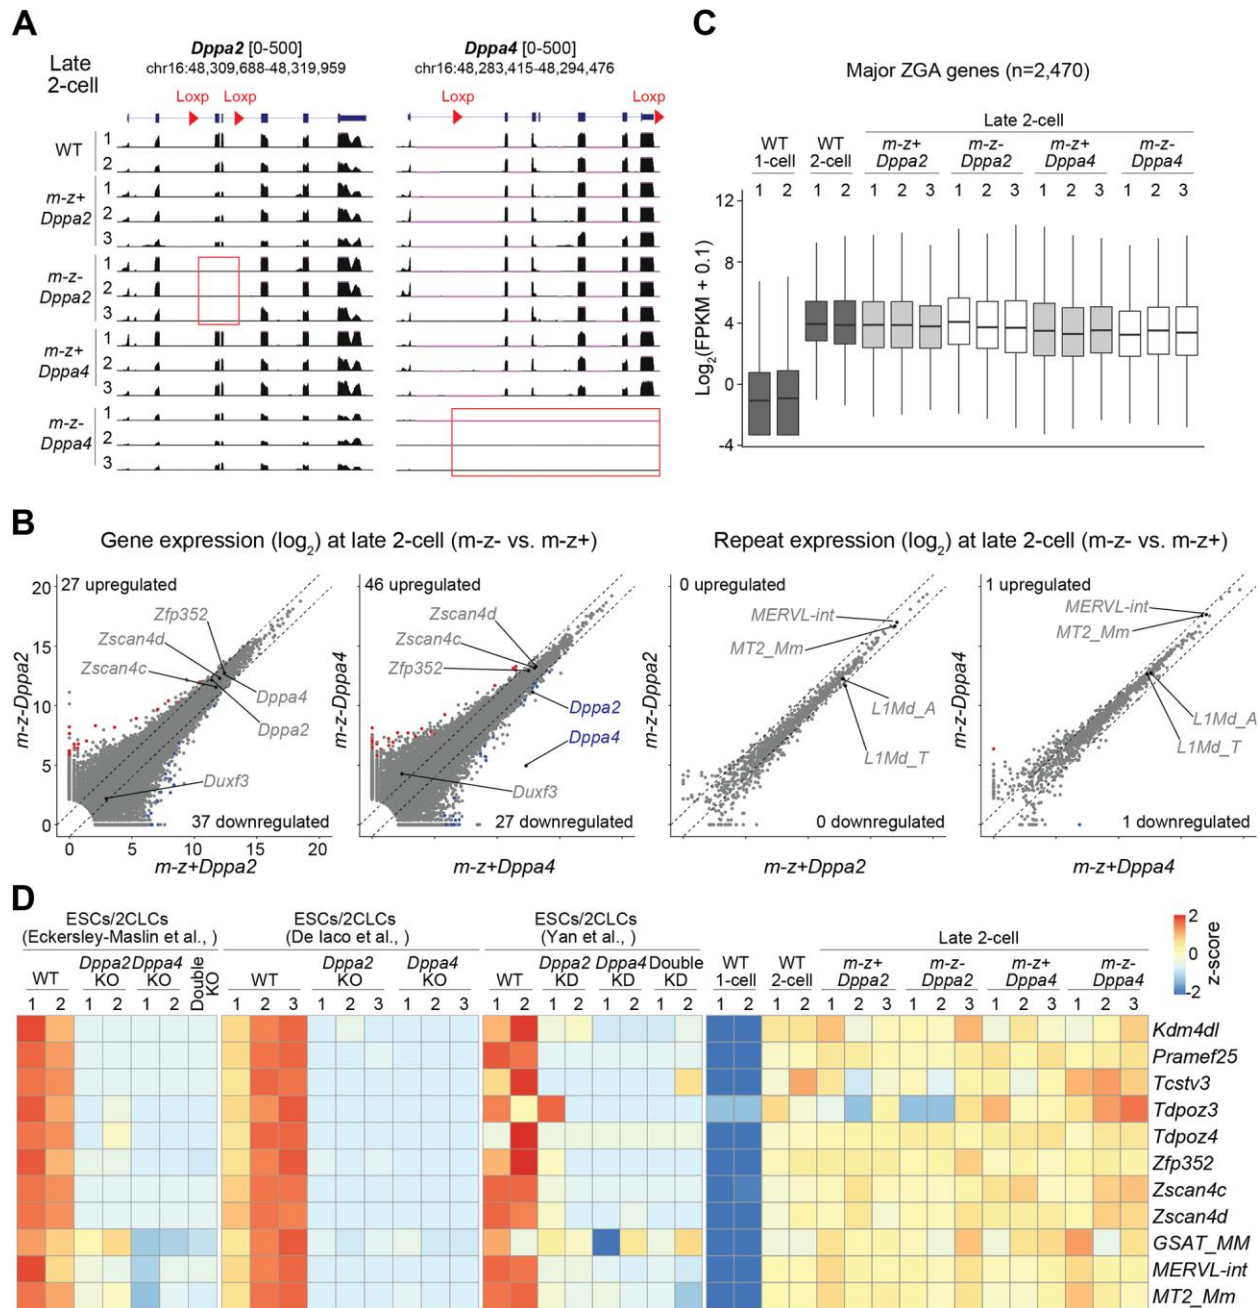

**Figure 4. *Dppa2* and *Dppa4* maternal-zygotic KO embryos undergo normal ZGA**

**A)** Genome browser views of indicated RNA-seq samples at *Dppa2* and *Dppa4* loci. Cre-mediated deletion of exons are highlighted by red boxes.

**B)** Scatter plots comparing gene/repeat expression levels of 2-cell embryos (*m-z-* vs. *m-z+*). The x and y axes are normalized read counts by DESeq2 ( $\log_2$ ) (Love et al. 2014). Differential gene expression criteria were fold change (FC) > 2, adjusted P-value < 0.05 and FPKM > 1.

**C)** Boxplot illustrating the expression levels of major ZGA genes of indicated samples. The major ZGA genes were defined using cutoff: 2-cell/1-cell FC > 5, 2-cell FPKM > 3, adjusted p-value < 0.05. The middle lines represent medians. The box hinges indicate the 25<sup>th</sup> and 75<sup>th</sup> percentiles, and the whiskers indicate the hinge  $\pm 1.5 \times$  interquartile range.

**D)** Heatmap illustrating the expression levels of example genes/repeats in ESCs/2-cell like cells (2CLCs) and 2-cell embryos. The RNA-seq data of ESCs/2CLCs were from (De Iaco et al. 2019; Eckersley-Maslin et al. 2019; Yan et al. 2019).

## Chen et al., Fig. S1

**A**Loxp sites knock-in at the *Dppa2* locus

| Cas9/<br>sgRNA1/sgRNA2/<br>donor DNA (ng/ $\mu$ l) | Injected<br>2-cell embryos | Transferred 2-cell<br>(Recipients) | Pups (%)  | Mice with loxp sites<br>knock-in (%) |
|----------------------------------------------------|----------------------------|------------------------------------|-----------|--------------------------------------|
| 100/80/80/25                                       | 60                         | 60 (3)                             | 24 (40.0) | 11/23 (47.8%)                        |

**B**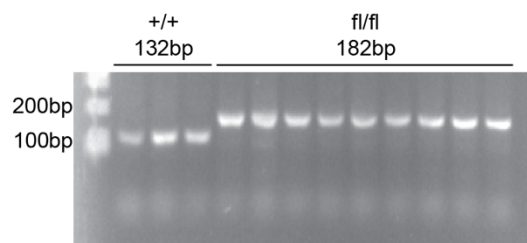**C**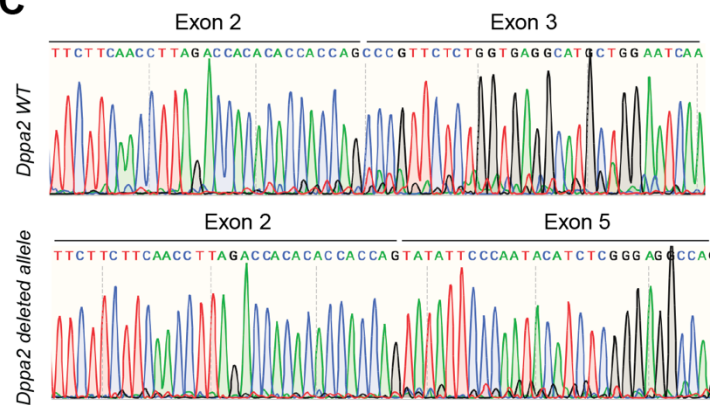**Fig. S1. Generation of *Dppa2* flox allele and CKO model**

- A)** Summary of the microinjection and embryo transfer experiments.
- B)** Representative gel image for *Dppa2* flox allele genotyping.
- C)** Sanger sequencing data showing the Cre-mediated deletion of exon 3-4 of *Dppa2* in oocytes.

**Chen et al., Fig. S2****A***Dppa2/4* *in vivo* E3.5 blastocysts collected after natural mating

| Mating pairs                                         | Blastocysts/litters | Blastocysts $\pm$ SD | m-z- (%) |
|------------------------------------------------------|---------------------|----------------------|----------|
| <i>Dppa2fl/fl</i> $\times$ <i>Dppa2+/-</i>           | 18/3                | 6.0 $\pm$ 1.7        | 0 (0)    |
| <i>Gdf9-Cre, Dppa2fl/fl</i> $\times$ <i>Dppa2+/-</i> | 21/3                | 7.0 $\pm$ 1.0        | 9 (42.8) |
| <i>Dppa4fl/fl</i> $\times$ <i>Dppa4+/-</i>           | 19/4                | 4.8 $\pm$ 0.9        | 0 (0)    |
| <i>Gdf9-Cre, Dppa4fl/fl</i> $\times$ <i>Dppa4+/-</i> | 17/3                | 5.6 $\pm$ 1.5        | 9 (52.9) |

**B****Dppa4** mating summary

| Mating pairs                                         | weaning pups /litters | litter size $\pm$ SD | m+z+ (%) | m-z+ (%)  | m-z- (%) |
|------------------------------------------------------|-----------------------|----------------------|----------|-----------|----------|
| <i>Dppa4fl/fl</i> $\times$ WT B6                     | 55/9                  | 6.9 $\pm$ 2.2        | 55 (100) | 0 (0)     | 0 (0)    |
| <i>Gdf9-Cre, Dppa4fl/fl</i> $\times$ WT B6           | 66/10                 | 6.6 $\pm$ 2.2        | 0 (0)    | 66 (100)  | 0 (0)    |
| <i>Gdf9-Cre, Dppa4fl/fl</i> $\times$ <i>Dppa4+/-</i> | 64/14                 | 4.5 $\pm$ 2.5        | 0 (0)    | 61 (95.3) | 3 (4.7)  |

| Mating pairs                                         | E18.5 pups /litters | E18.5 pups $\pm$ SD | m+z+ (%) | m-z+ (%)  | m-z- (%)  |
|------------------------------------------------------|---------------------|---------------------|----------|-----------|-----------|
| <i>Gdf9-Cre, Dppa4fl/fl</i> $\times$ <i>Dppa4+/-</i> | 60/9                | 6.6 $\pm$ 1.2       | 0 (0)    | 34 (56.6) | 26 (43.4) |

**Dppa2** mating summary

| Mating pairs                                         | weaning pups /litters | litter size $\pm$ SD | m+z+ (%) | m-z+ (%) | m-z- (%) |
|------------------------------------------------------|-----------------------|----------------------|----------|----------|----------|
| <i>Dppa2fl/fl</i> $\times$ WT B6                     | 28/4                  | 7.0 $\pm$ 1.8        | 28 (100) | 0 (0)    | 0 (0)    |
| <i>Gdf9-Cre, Dppa2fl/fl</i> $\times$ <i>Dppa2+/-</i> | 15/3                  | 5.0 $\pm$ 1.0        | 0 (0)    | 15 (100) | 0 (0)    |

| Mating pairs                                         | E18.5 pups /litters | E18.5 pups $\pm$ SD | m+z+ (%) | m-z+ (%) | m-z- (%) |
|------------------------------------------------------|---------------------|---------------------|----------|----------|----------|
| <i>Gdf9-Cre, Dppa2fl/fl</i> $\times$ <i>Dppa2+/-</i> | 13/2                | 6.5 $\pm$ 3.5       | 0 (0)    | 5 (38.5) | 8 (61.5) |

**C**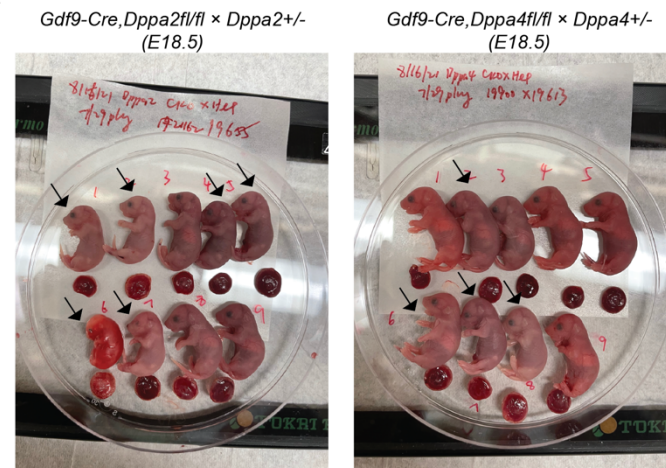

↘ m-z-

Others are m-z+.

**Fig. S2. Embryos without DPPA2 or DPPA4 show perinatal lethality**A) Summary of E3.5 *in vivo* blastocysts collected.B) Mating summary of *Dppa2* and *Dppa4* mutants.C) Representative images of E18.5 pups of *Dppa2* and *Dppa4* mutants.

Chen et al., Fig. S3

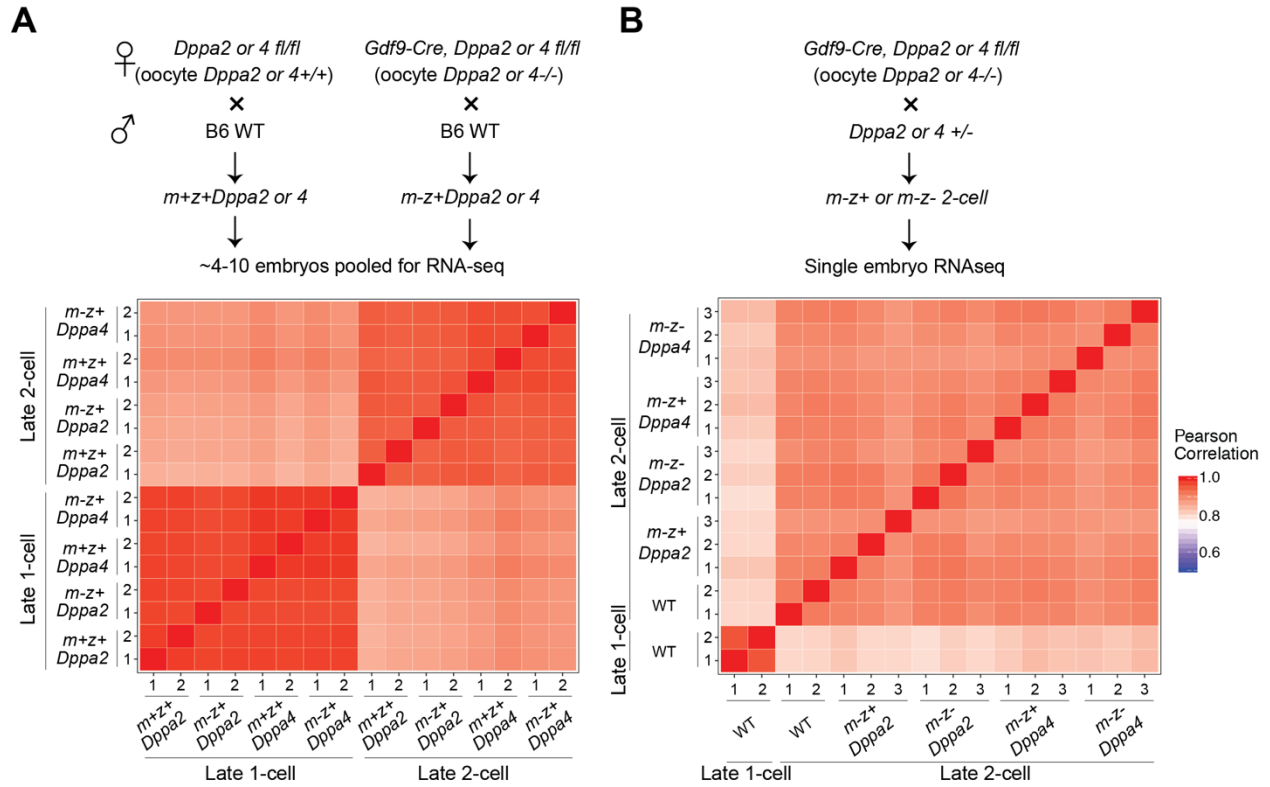

**Fig. S3. Reproducibility of RNA-seq experiments**

For both panels **A-B**), top panels showing the scheme for collecting pooled or single embryos for RNA-seq and bottom panels showing the Pearson correlation heatmaps.



## Chen et al., Fig. S4

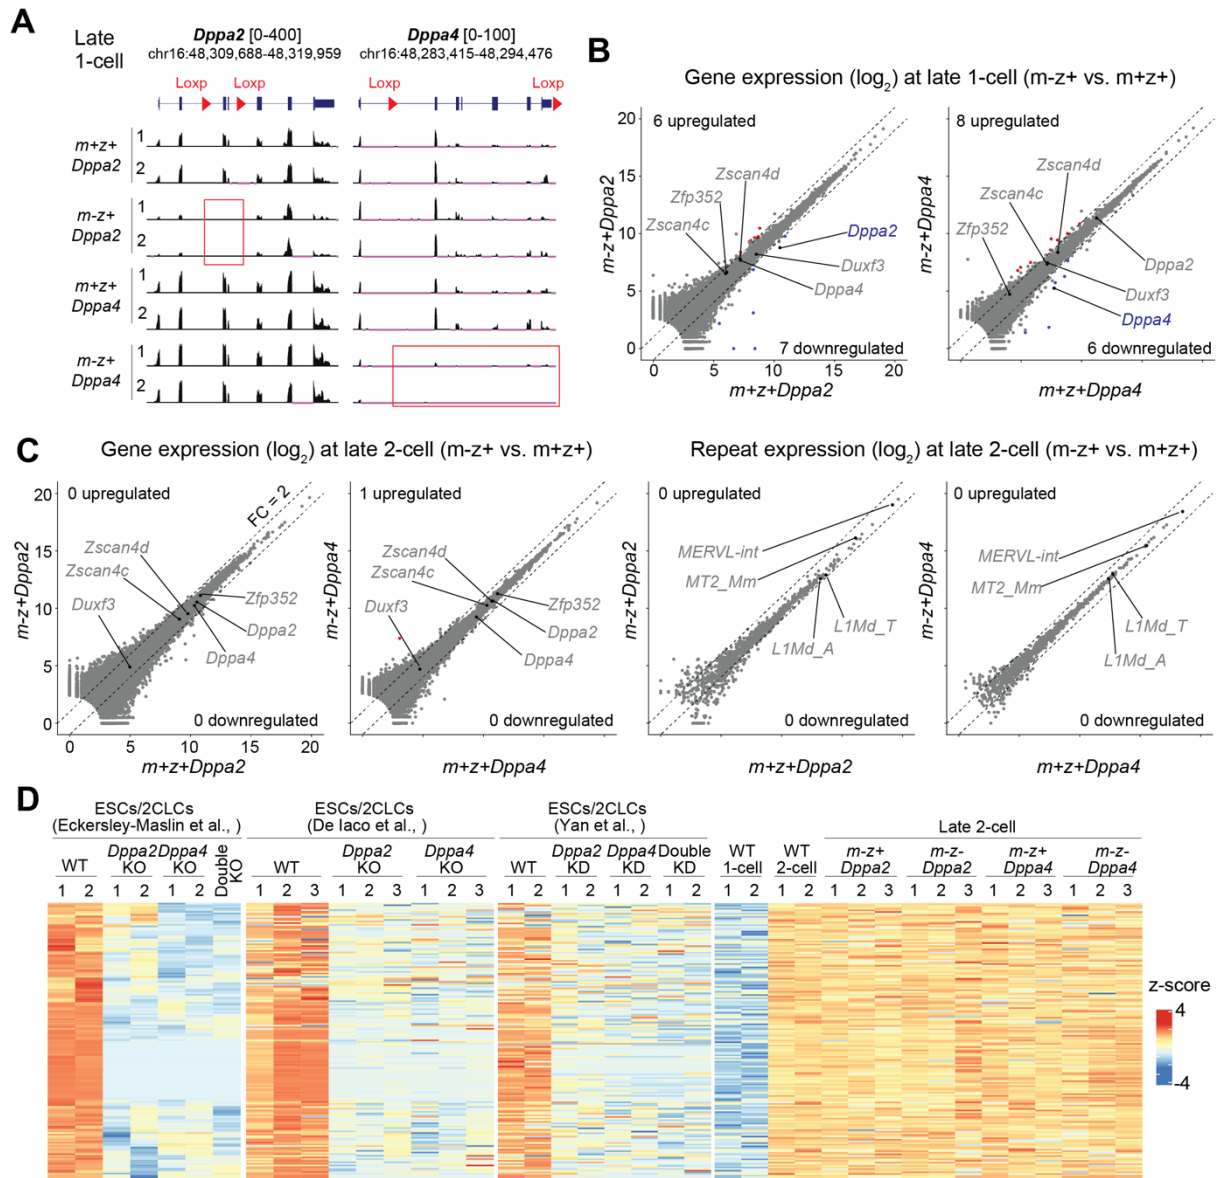

**Fig. S4. Maternal DPPA2 and DPPA4 are not responsible for activating *Dux* and ZGA**

**A)** Genome browser views of indicated RNA-seq samples at *Dppa2* and *Dppa4* loci. Cre-mediated deletion of exons are highlighted by red boxes.

**B)** Scatter plots comparing gene expression levels of 1-cell embryos (*m-z+* vs. *m+z+*). The x and y axes are normalized read counts by DESeq2 ( $\log_2$ ) (Love et al. 2014). Differential gene expression criteria were fold change (FC) > 2, adjusted P-value < 0.05 and FPKM > 1. Note that the dots outside the dashed FC lines were not classified as differentially expressed because of their large P-values and/or low FPKM (**Table S1**).

**C)** Scatter plots comparing gene/repeat expression levels of 2-cell embryos (*m-z+* vs. *m+z+*).

**D)** Heatmap showing the expression levels of DPPA2/4-dependent ZGA genes in ESCs/2CLCs and 2-cell embryos. ZGA genes that were down-regulated in either *Dppa2* or *Dppa4* KO ESCs (Eckersley-Maslin et al.,) (fold change > 2 & adjusted p-value < 0.05) were selected (n = 170).

**Table S1. Differential gene expression analyses in *Dppa2* and *Dppa4* mutant embryos**

[Click here to download Table S1](#)

**Table S2. Summary of generated RNA-seq datasets**

[Click here to download Table S2](#)

**Table S3. List of primers and antibodies**

[Click here to download Table S3](#)
